# Supplementary material for: Highly entangled hollow TiO2 nanoribbons templating diphenylalanine assembly
Source: Royal Society of Chemistry journal article supplement (doi:10.1039/b819254e), 2009-01-01
Supplement: b819254e.pdf [file b819254e.pdf]

Supplementary Material (ESI) for Journal of Materials Chemistry  
This journal is © The Royal Society of Chemistry 2009

## **Supplementary Information**

# **Highly Entangled Hollow TiO<sub>2</sub> Nanoribbons Templating Diphenylalanine Assembly**

Tae Hee Han, Jun Kyun Oh, Ji Sun Park, Se-Hun Kwon, Sung-Wook Kim  
and Sang Ouk Kim\*

Department of Materials Science and Engineering, KAIST Institute for Nanocentury,  
KAIST  
Daejeon, 305-701, Republic of Korea

email: [sangouk.kim@kaist.ac.kr](mailto:sangouk.kim@kaist.ac.kr)

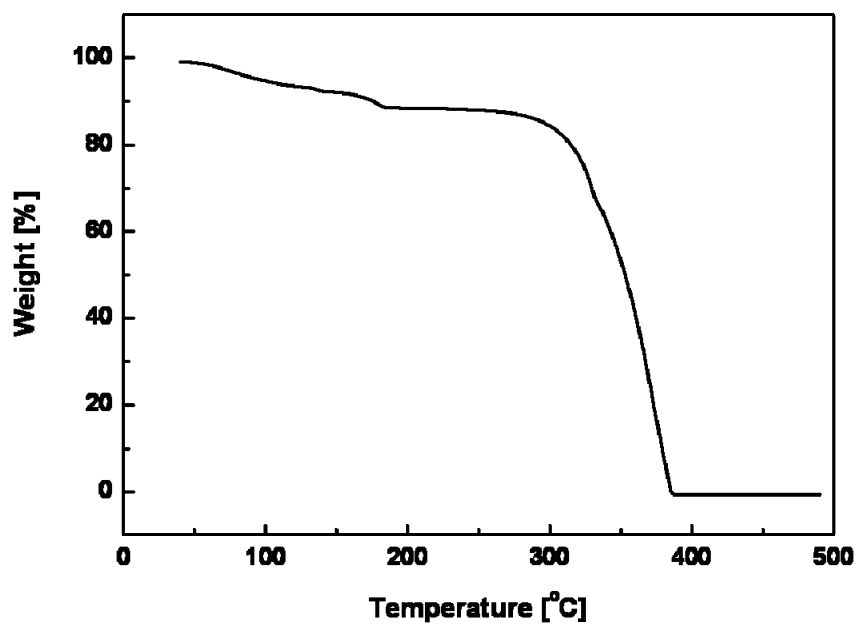

**Figure S1.** Thermogravimetric analysis curve of a peptide xerogel during a heating process. The major thermal degradation occurred above 300 °C.

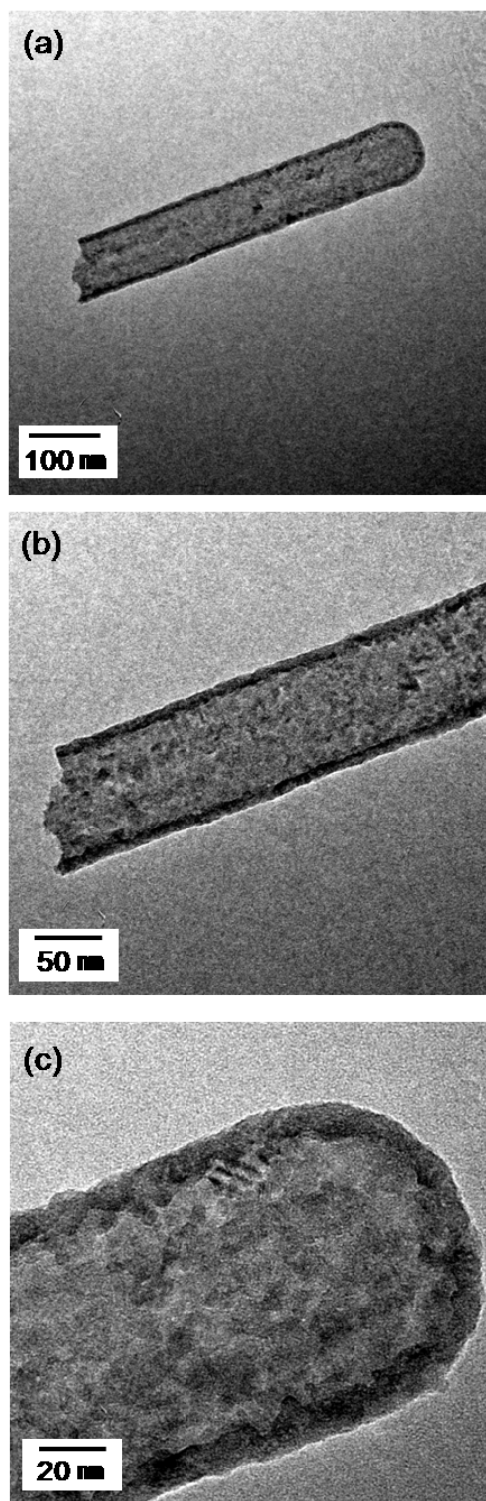

**Figure S2.** TEM images of a TiO<sub>2</sub> nanoribbon with both an open-end and a closed-end.

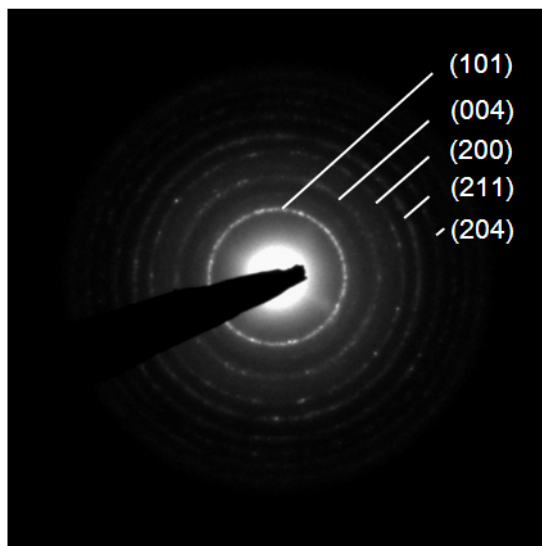

**Figure S3. A selected area electron diffraction pattern of a crystalline TiO<sub>2</sub> nanoribbon.**

The pattern shows a set of diffraction rings, whose lattice spacings are consistent with those of the anatase TiO<sub>2</sub> crystalline structure (PDF no. 21-1272).

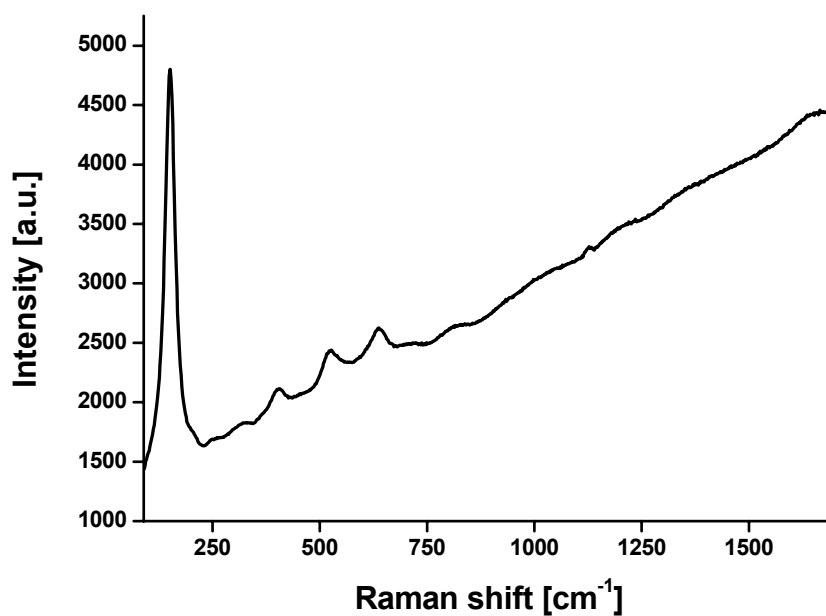

**Figure S4. Raman spectrum of crystalline TiO<sub>2</sub> nanoribbons.** Typical Raman vibration properties of anatase TiO<sub>2</sub> are shown. The peak of 1130 cm<sup>-1</sup> is due to the glass substrate.
